# Supplementary material for: Peptide Nanofiber System for Sustained Delivery of Anti-VEGF Proteins to the Eye Vitreous
Source: MDPI journal article supplement (doi:10.3390/pharmaceutics15041264), 2023-04-18
Supplement: s1 [file s1]

## Supporting Information for

### Peptide Nanofiber System for Sustained Delivery of Anti-VEGF Proteins to the Eye Vitreous

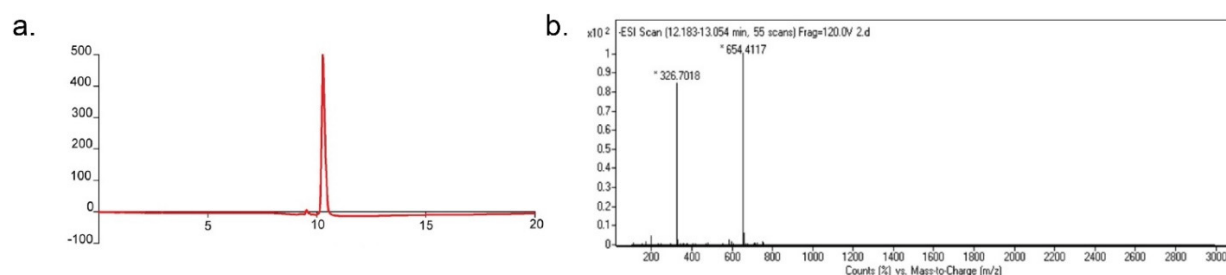

**Figure S1 (a)** Reverse-HPLC chromatogram and **(b)** Liquid chromatography-mass spectrometry (LC-MS) analyses of E-PA

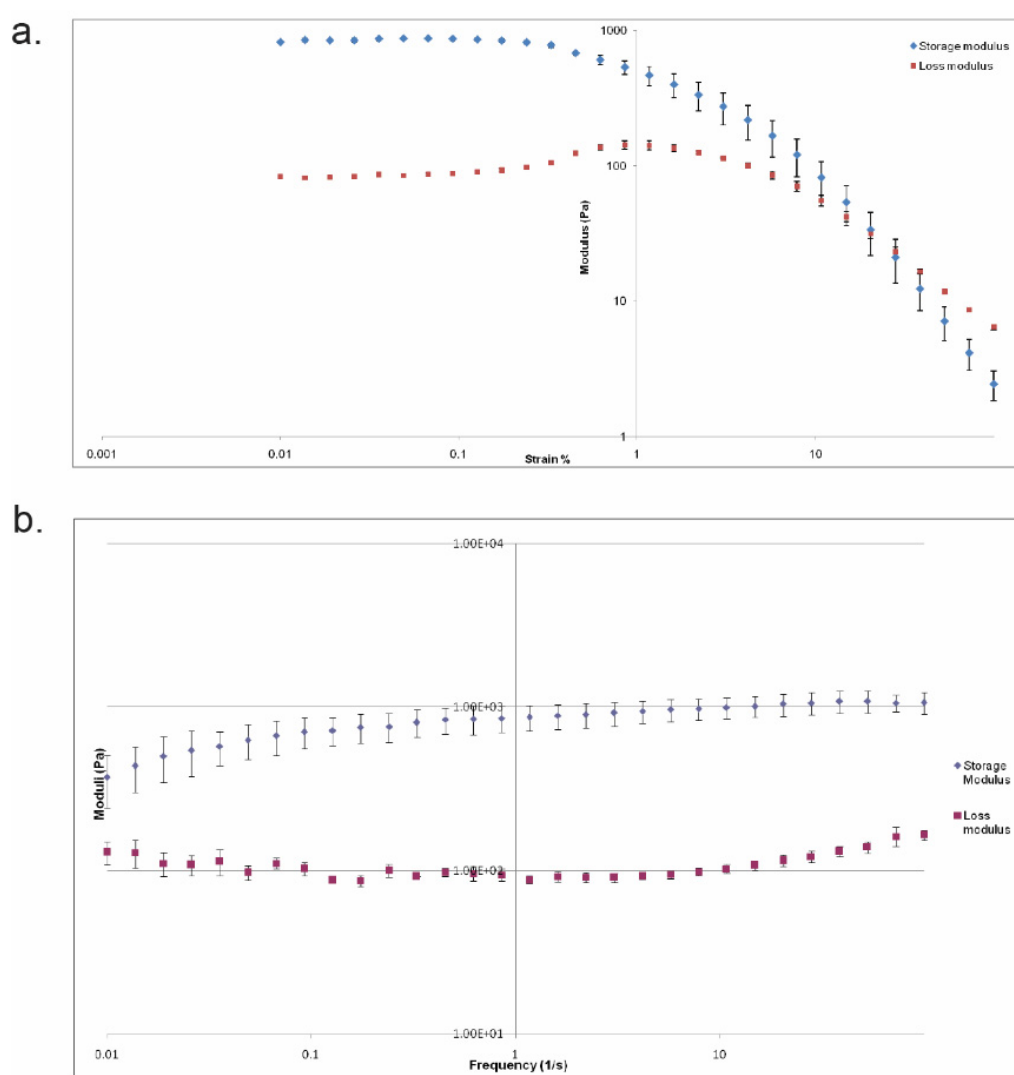

**Figure S2** Rheology measurements showing **(a)** amplitude sweep and **(b)** frequency sweep of Ranibizumab:E-PA hydrogel

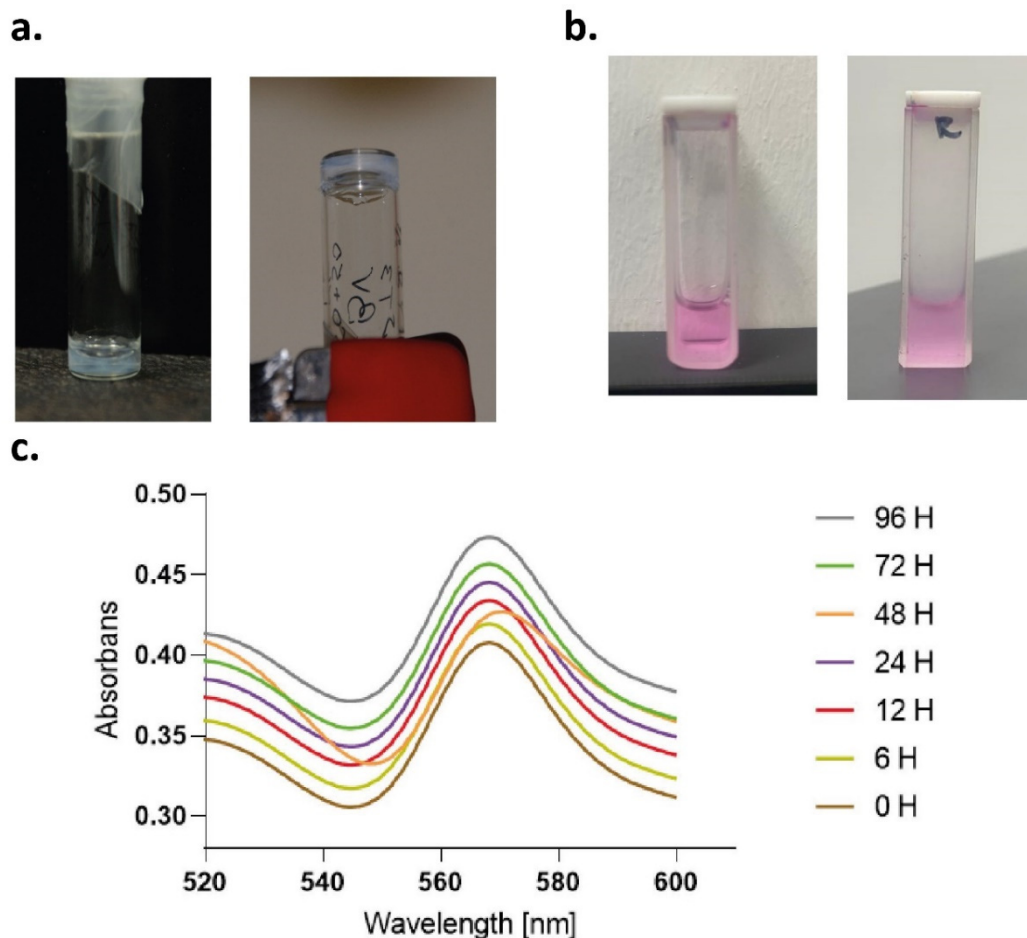

**Figure S3** Enzymatic degradation of nanofiber. **(a)** Image of the formed nanofiber. **(b)** The image of the nanofiber mixed with the marker molecule Rhodamin B at t=0h (first image) and at t=96 h(second image) **(c)** The absorbance of the nanofiber containing Rhodamin B in the range of 0-96 hours following incubation with Proteinase K enzyme.

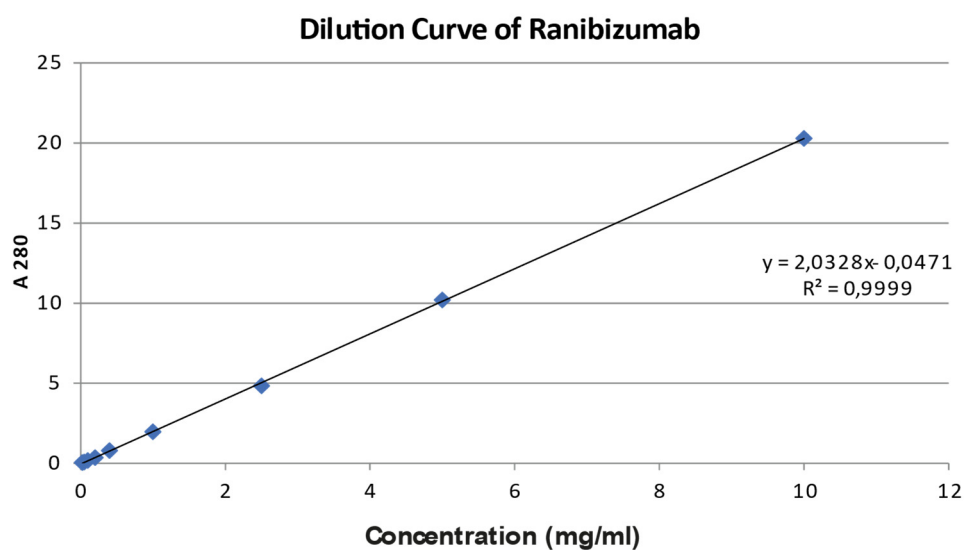

**Figure S4.** Standard curve of ranibizumab quantification through A280 protocol

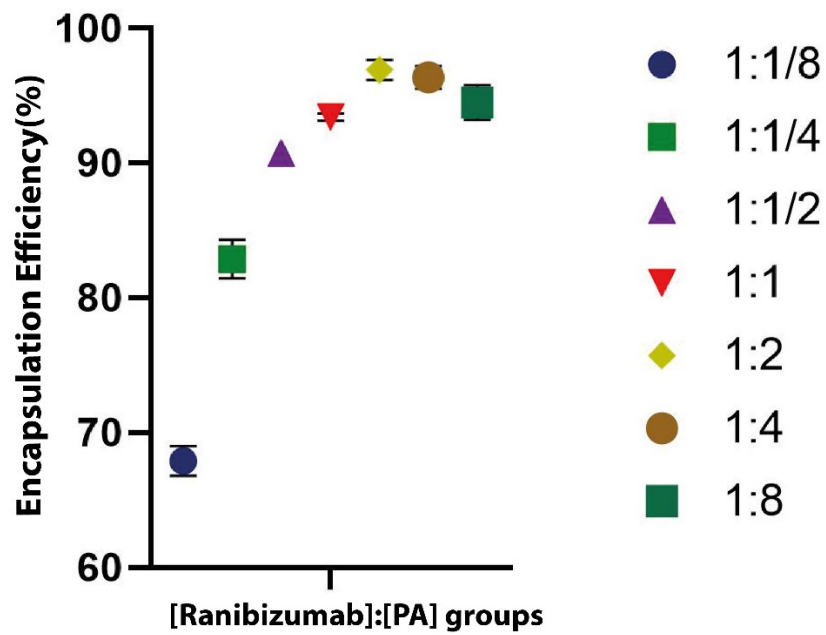

**Figure S5.** Comparison of different [Ranibizumab]:[PA] groups in encapsulation efficiency

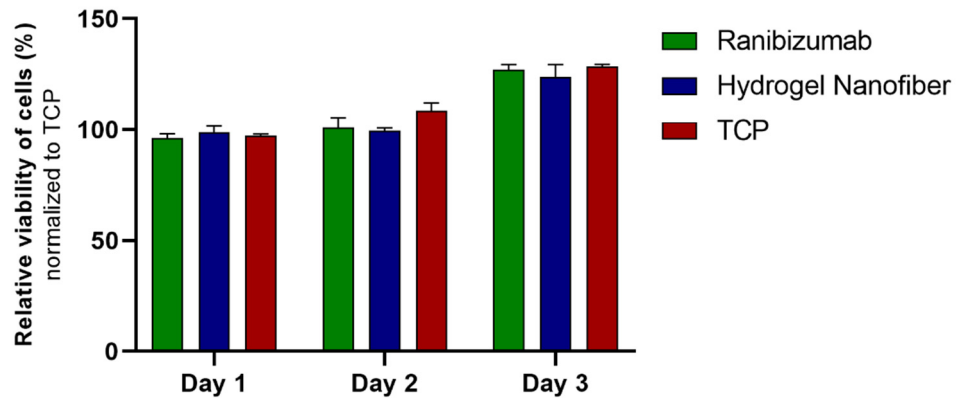

**Figure S6.** Viability analysis of ARPE-19 cells cultured on indicated platforms for day 1, 2 and 3. Results normalized to Day 1 TCP values.

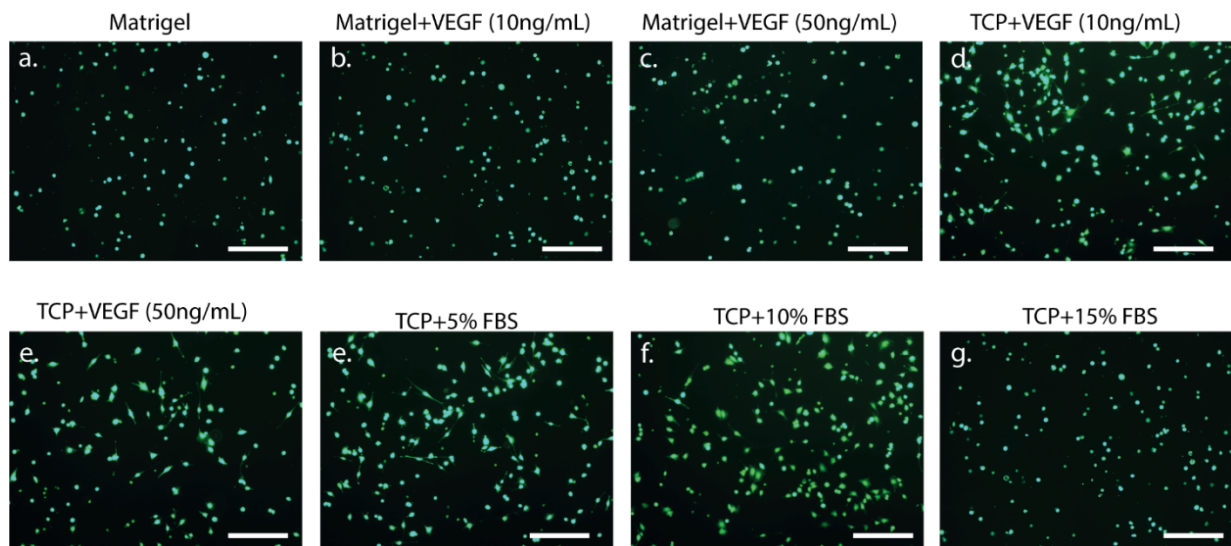

**Figure S7** HUVECs cultured either on Matrigel or TCP with different VEGF concentrations stained with Calcein AM (Invitrogen) at 4 h (Scale bar; 50 nm)

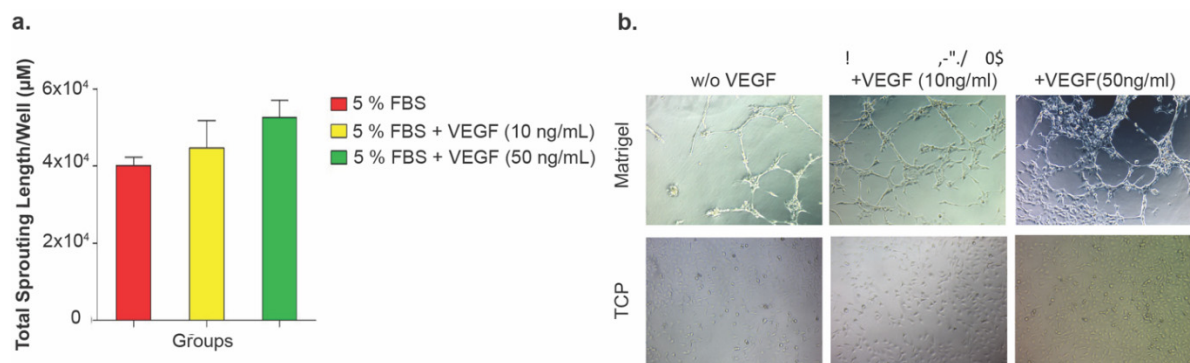

**Figure S8** HUVECs cultured either on Matrigel or TCP with different VEGF concentrations. (a) The number of total sprouting area formed by HUVECs cultured on Matrigel in the absence of VEGF and in the presence of VEGF (10 ng/mL and 50 ng/mL). (b) Light microscope images of HUVECs cultured on Matrigel or TCP.

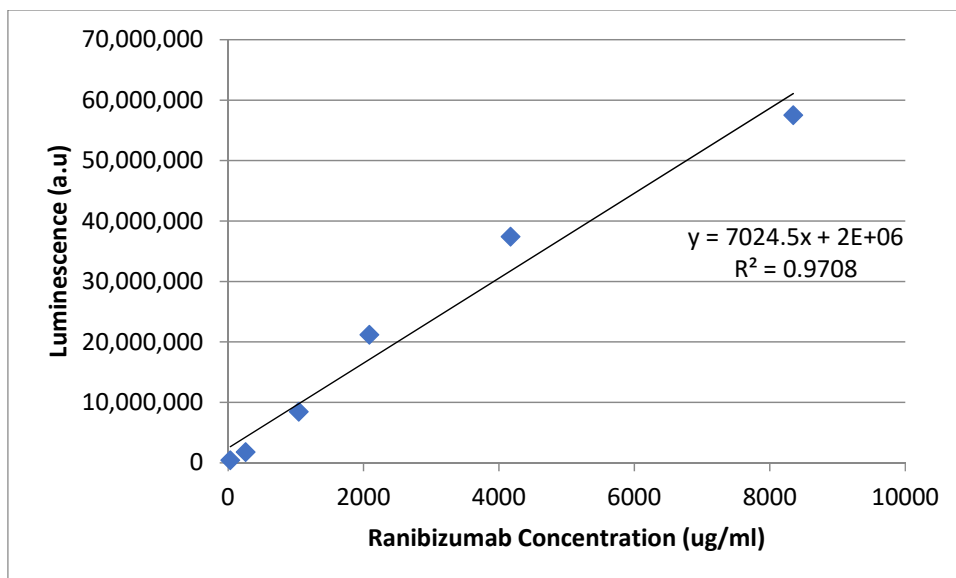

**Figure S9.** Standard curve of ranibizumab quantification through ELISA

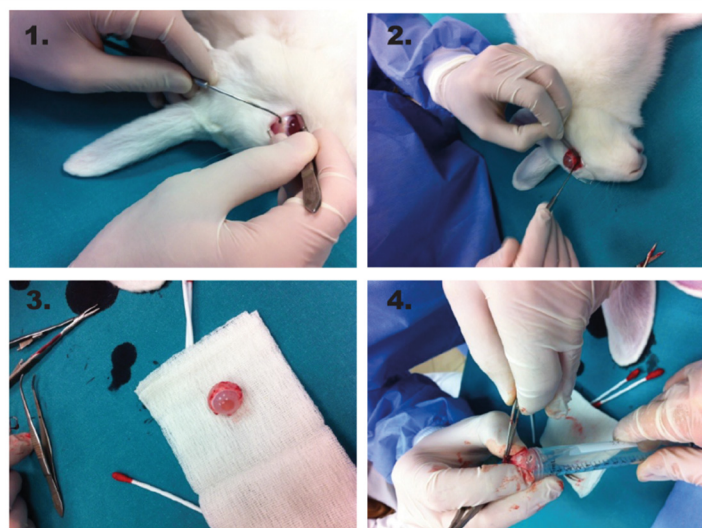

**Figure S10.** Phases of in vivo experiment.
